# Supplementary material for: On the origin of POU5F1
Source: PubMed Central journal article supplement (PMC3665618; doi:10.1186/1741-7007-11-56), 2013-05-09

# Additional file 1

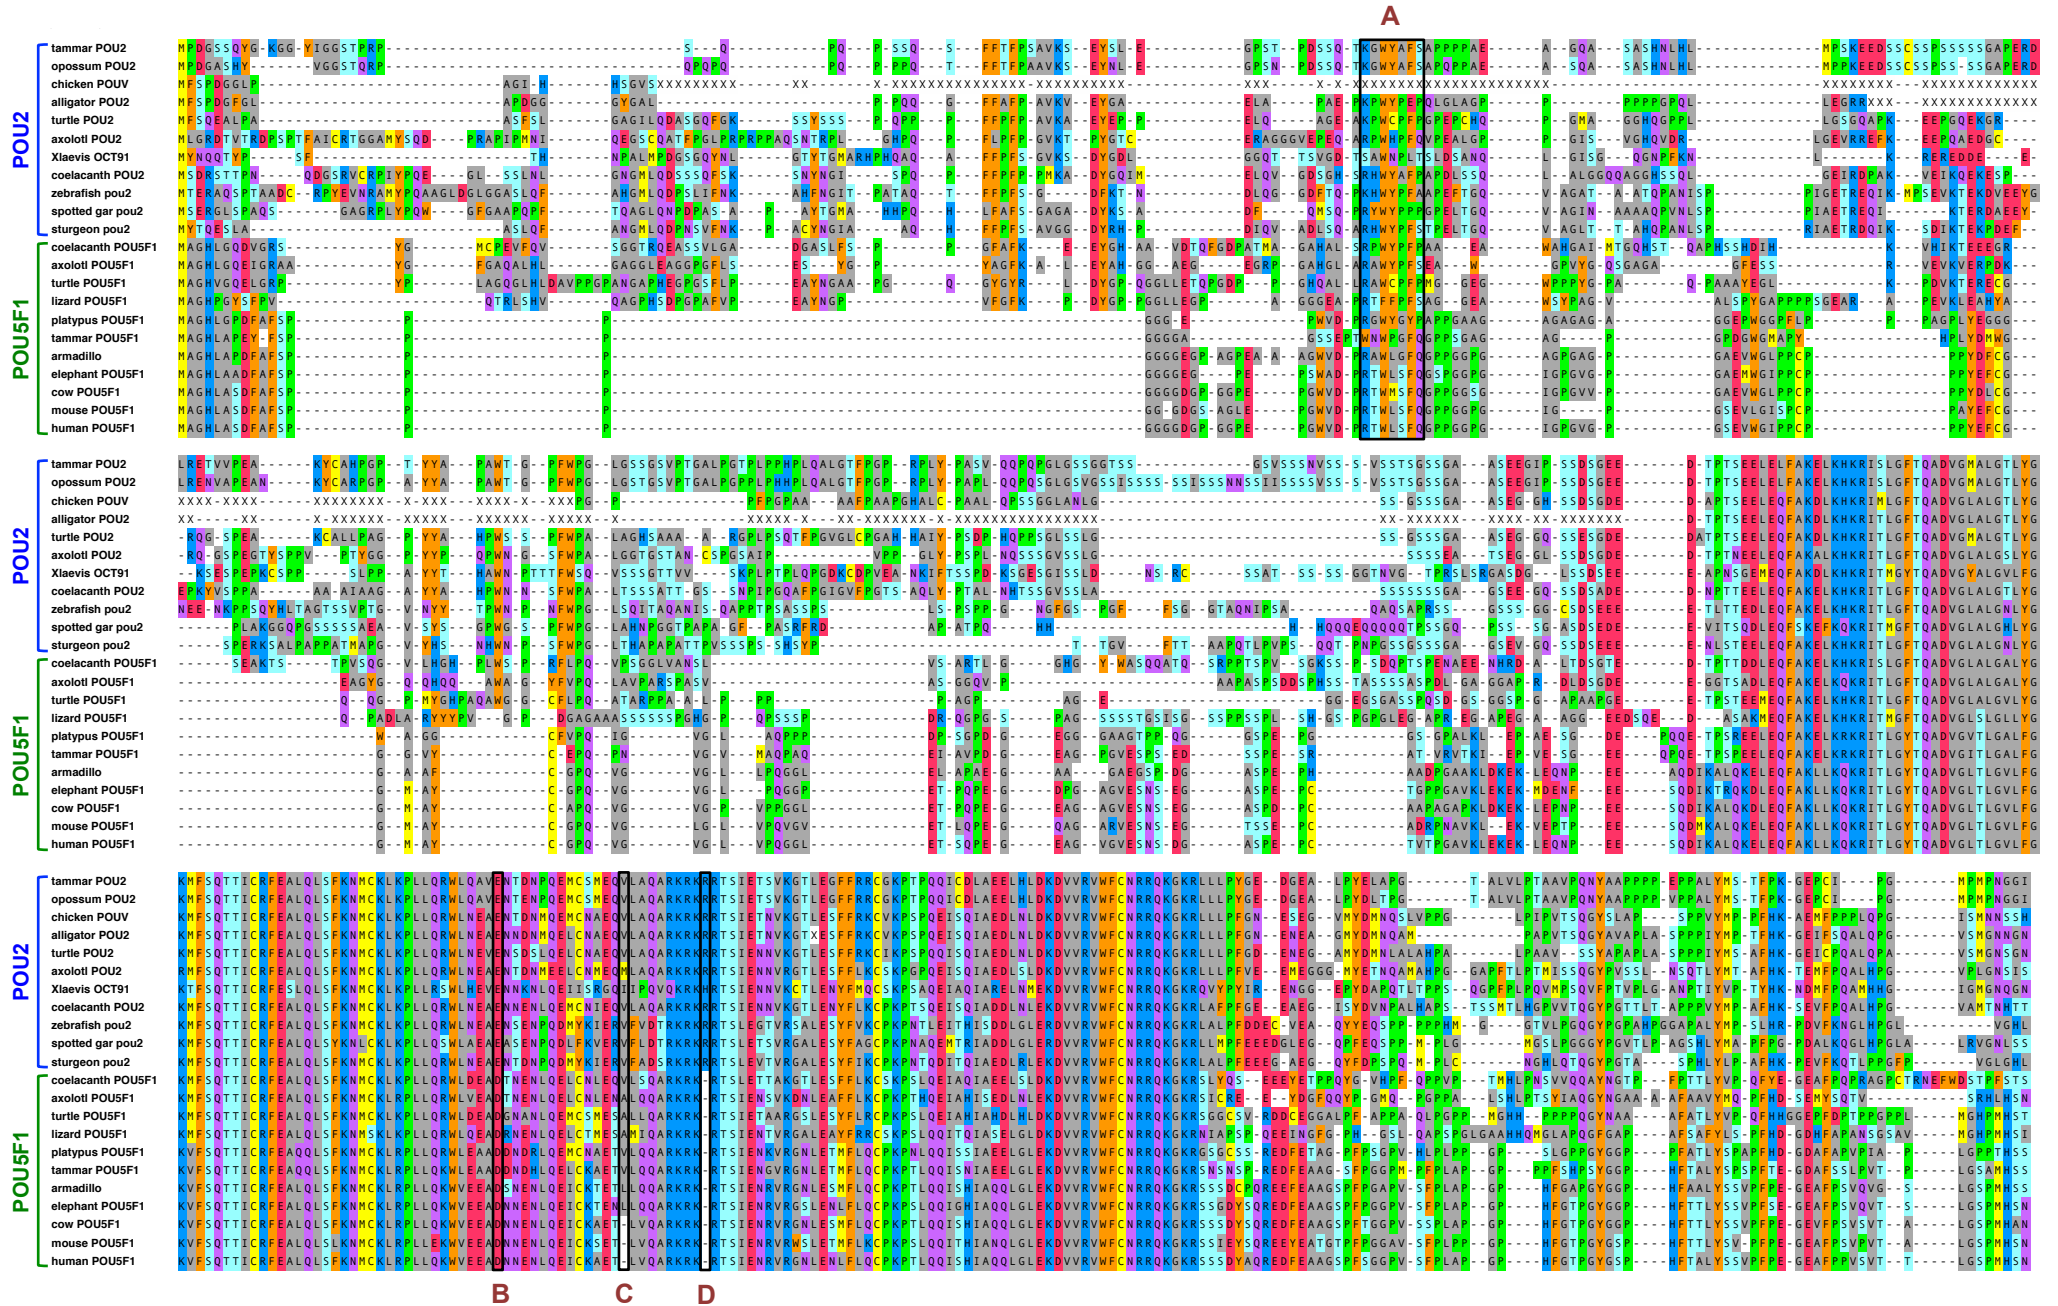

Supplement: 1741-7007-11-56-S1.pdf [file 1741-7007-11-56-S1.pdf]
