# Supplementary material for: On the origin of POU5F1
Source: PubMed Central journal article supplement (PMC3665618; doi:10.1186/1741-7007-11-56), 2013-05-09

# Additional file 3

## Exon 1

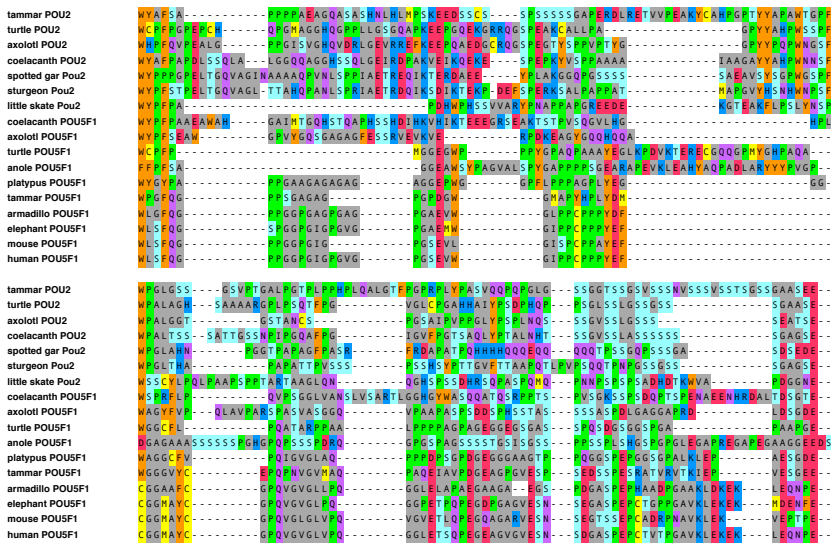

## Exon 2

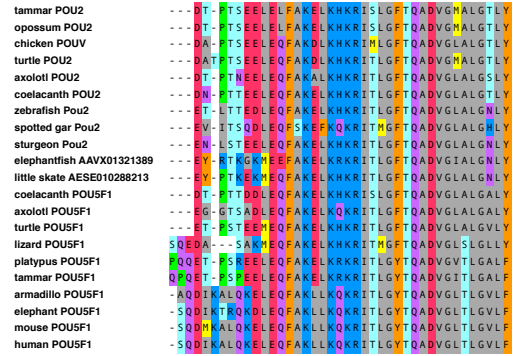

## Exon 2-3

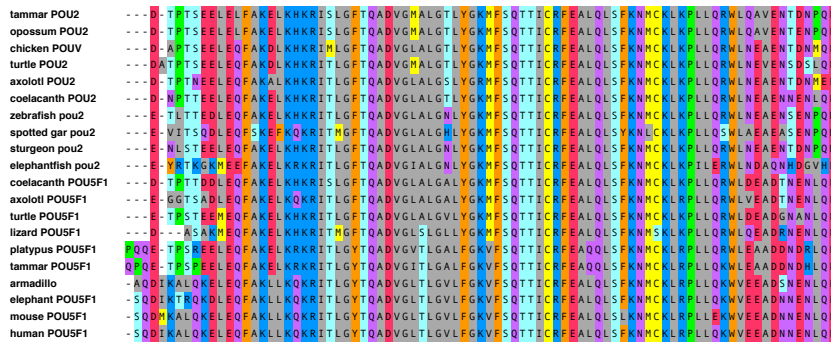

## Exon 3

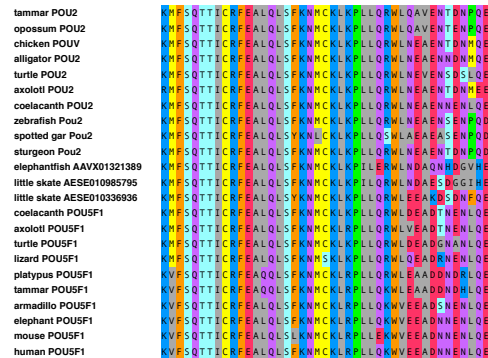

## Exon 4

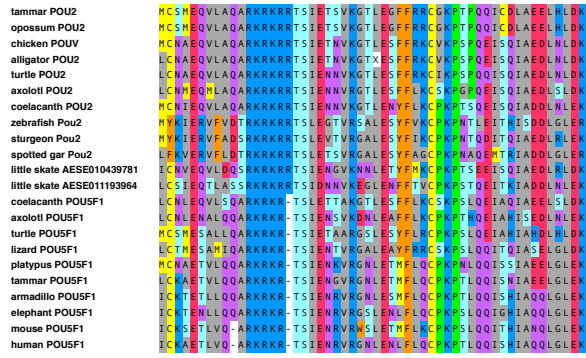

## Exon 5

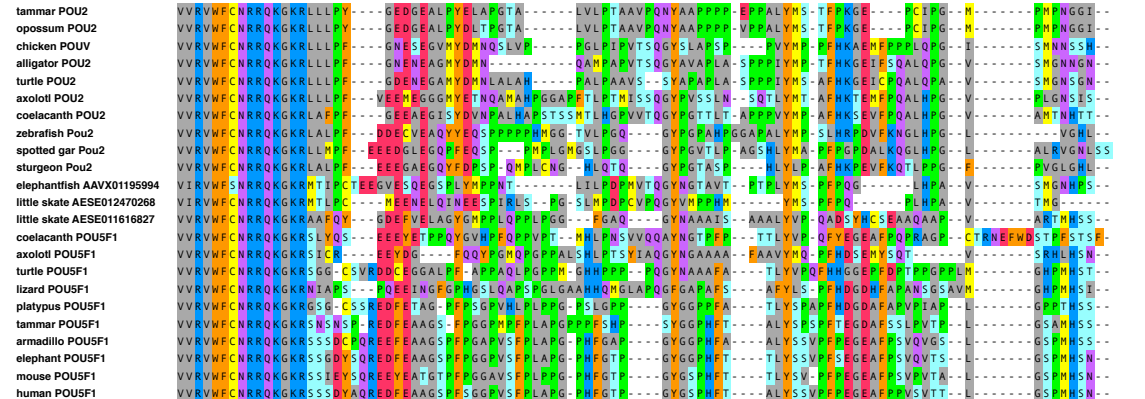

Supplement: 1741-7007-11-56-S3.pdf [file 1741-7007-11-56-S3.pdf]
