# Supplementary material for: On the origin of POU5F1
Source: PubMed Central journal article supplement (PMC3665618; doi:10.1186/1741-7007-11-56), 2013-05-09
Supplement: 1741-7007-11-56-S4.pdf [file 1741-7007-11-56-S4.pdf]

# Additional file 4

| gene                                                         | species                                                      | GenBank source                                                                                                                       |                                                                                     |
|--------------------------------------------------------------|--------------------------------------------------------------|--------------------------------------------------------------------------------------------------------------------------------------|-------------------------------------------------------------------------------------|
| <i>POU2</i><br>( & avian <i>POUV</i> )                       | tammar wallaby ( <i>Macropus eugenii</i> )                   | FJ998420                                                                                                                             |                                                                                     |
|                                                              | grey short-tailed opossum ( <i>Monodelphis domestica</i> )   | NM_001242727                                                                                                                         |                                                                                     |
|                                                              | chicken ( <i>Gallus gallus</i> )                             | partial Exon 1: WGS trace archives Ti:224571611 (62-8, adjusted from chromatogram); DR410403                                         |                                                                                     |
|                                                              | alligator ( <i>Alligator mississippiensis</i> )              | partial Exon 1: AKHW01037339 (17977-18192); Exons 2-5: AKHW01037340 (6299-6410, 7612-7742, 11209-11377, 11884-12129)                 |                                                                                     |
|                                                              | painted turtle ( <i>Chrysemys picta bellii</i> )             | AHGY01090879 (23030-23629, 30326-30440, 31140-31270), AHGY01090878 (4146-4310), AHGY01090877 (649-903)                               |                                                                                     |
|                                                              | axolotl ( <i>Ambystoma mexicanum</i> )                       | kindly provided by Natalia Tapia                                                                                                     |                                                                                     |
|                                                              | African clawed frog ( <i>Xenopus laevis</i> ) (OCT91)        | NM_001087873                                                                                                                         |                                                                                     |
|                                                              | coelacanth ( <i>Latimeria chalumnae</i> )                    | JH126767 (739970-739293, 735489-735378, 725094-724964, 718795-718631, 713786-713511)                                                 |                                                                                     |
|                                                              | zebrafish ( <i>Danio rerio</i> )                             | NM_131112                                                                                                                            |                                                                                     |
|                                                              | spotted gar ( <i>Lepisosteus oculatus</i> )                  | AHAT01021728 (2445-1807, 595-484, 372-242), AHAT01021727 (2103-1939, 1785-1519)                                                      |                                                                                     |
|                                                              | sturgeon ( <i>Acipenser sinensis</i> )                       | JN099311                                                                                                                             |                                                                                     |
|                                                              | <i>POU5F1</i>                                                | human ( <i>Homo sapiens</i> )                                                                                                        | NM_002701                                                                           |
|                                                              |                                                              | mouse ( <i>Mus musculus</i> )                                                                                                        | NM_013633                                                                           |
| cow ( <i>Bos taurus</i> )                                    |                                                              | NM_174580                                                                                                                            |                                                                                     |
| elephant ( <i>Loxodonta africana</i> )                       |                                                              | AAGU03089405 (39093-39485, 42778-42898, 43187-43317, 43645-43806, 43989-44255)                                                       |                                                                                     |
| armadillo ( <i>Dasypus novemcinctus</i> )                    |                                                              | AAGV03091916 (6753-6349-, 4495-4375, 4263-4133, 3996-3835, 3749-3483)                                                                |                                                                                     |
| tammar wallaby ( <i>Macropus eugenii</i> )                   |                                                              | FJ998419                                                                                                                             |                                                                                     |
| platypus ( <i>Ornithorhynchus anatinus</i> )                 |                                                              | NM_001242727                                                                                                                         |                                                                                     |
| green anole ( <i>Anolis carolinensis</i> )                   |                                                              | AAWZ02031141 (14055-13444, 303-195), AAWZ02031140 (50510-50380, 48892-48731, 47207-46932)                                            |                                                                                     |
| Indian python ( <i>Python molurus</i> )                      |                                                              | partial Exon 1: AEQU010514509 (1-247); Exons 2-5: AEQU010362508 (1527-1416, 566-436), AEQU010743304 (240-126), AEQU010331488 (1-285) |                                                                                     |
| painted turtle ( <i>Chrysemys picta bellii</i> )             |                                                              | AHGY01526669 (432-995), AHGY01303135 (1193-1082, 623-493), AHGY01303134 (178-17), AHGY01303133 (2081-1811)                           |                                                                                     |
| axolotl ( <i>Ambystoma mexicanum</i> )                       |                                                              | AY542376                                                                                                                             |                                                                                     |
| coelacanth ( <i>Latimeria chalumnae</i> )                    |                                                              | AFYH01090867 (17555-18199), BAH001146254 (698-809, 2975-3105, 3982-4143, 4560-4850)                                                  |                                                                                     |
| Chondrichthyes<br><i>POU2/POU5F1</i><br>homologues           |                                                              | elephantfish ( <i>Callorhynchus milii</i> ) Exons 2-3                                                                                | AAVX01321389 (1557-1446, 565-435)                                                   |
|                                                              | elephantfish ( <i>Callorhynchus milii</i> ) Exon 5           | AAVX01195994 (437-192)                                                                                                               |                                                                                     |
|                                                              | little skate ( <i>Leucoraja erinacea</i> ) Exon 1 (partial)  | AESE011687962 (1-375)                                                                                                                |                                                                                     |
|                                                              | little skate ( <i>Leucoraja erinacea</i> ) Exon 2            | AESE010288213 (446-557)                                                                                                              |                                                                                     |
|                                                              | little skate ( <i>Leucoraja erinacea</i> ) Exon 3            | AESE010985795 (230-100)                                                                                                              |                                                                                     |
|                                                              | little skate ( <i>Leucoraja erinacea</i> ) Exon 3            | AESE010336936 (802-672)                                                                                                              |                                                                                     |
|                                                              | little skate ( <i>Leucoraja erinacea</i> ) Exon 4            | AESE011193964 (297-133)                                                                                                              |                                                                                     |
|                                                              | little skate ( <i>Leucoraja erinacea</i> ) Exon 4            | AESE010439781 (180-16)                                                                                                               |                                                                                     |
|                                                              | little skate ( <i>Leucoraja erinacea</i> ) Exon 5 (partial)  | AESE012470268 (1-220)                                                                                                                |                                                                                     |
|                                                              | little skate ( <i>Leucoraja erinacea</i> ) Exon 5            | AESE011616827 (692-438)                                                                                                              |                                                                                     |
|                                                              | <i>NPDC1</i><br>(Exons 5-9)                                  | coelacanth ( <i>Latimeria chalumnae</i> )                                                                                            | AFYH01056513 (9699-9633, 8270-8186, 6195-6116, 4750-4651), AFYH01056512 (9547-9470) |
| spotted gar ( <i>Lepisosteus oculatus</i> )                  |                                                              | AHAT01021729 (5684-5618, 4889-4805, 4688-4609, 4472-4373, 3219-3148)                                                                 |                                                                                     |
| zebrafish ( <i>Danio rerio</i> )                             |                                                              | NM_001128783                                                                                                                         |                                                                                     |
| medaka ( <i>Oryzias latipes</i> )                            |                                                              | AM301011                                                                                                                             |                                                                                     |
| salmon ( <i>Salmo salar</i> )                                |                                                              | NM_001173856                                                                                                                         |                                                                                     |
| painted turtle ( <i>Chrysemys picta bellii</i> ) (Exons 5-9) |                                                              | AHGY01090880 (17417-17482, 18922-19000, 19260-19339, 19642-19738), AHGY01090879 (503-580)                                            |                                                                                     |
| chicken ( <i>Gallus gallus</i> )                             |                                                              | XM_001233958                                                                                                                         |                                                                                     |
| platypus ( <i>Ornithorhynchus anatinus</i> ) (Exons 5-7)     |                                                              | AAPN01166064 (2178-2112, 1875-1791, 687-608)                                                                                         |                                                                                     |
| tammar wallaby ( <i>Macropus eugenii</i> )                   |                                                              | FY568867                                                                                                                             |                                                                                     |
| grey short-tailed opossum ( <i>Monodelphis domestica</i> )   |                                                              | XM_001374335                                                                                                                         |                                                                                     |
| elephant ( <i>Loxodonta africana</i> )                       |                                                              | AAGU03092129 (4108-4174, 4253-4337, 4418-4497, 4742-4838)                                                                            |                                                                                     |
| mouse ( <i>Mus musculus</i> )                                |                                                              | NM_008721                                                                                                                            |                                                                                     |
| human ( <i>Homo sapiens</i> )                                |                                                              | NM_015392                                                                                                                            |                                                                                     |
| elephantfish ( <i>Callorhynchus milii</i> ) Exons 5-6        |                                                              | AAVX01002865 (2746-2812, 3205-3293)                                                                                                  |                                                                                     |
| elephantfish ( <i>Callorhynchus milii</i> ) Exons 7-8        |                                                              | AAVX01174269 (965-886, 570-471)                                                                                                      |                                                                                     |
| elephantfish ( <i>Callorhynchus milii</i> ) Exons 9          |                                                              | AAVX01063171 (561-638)                                                                                                               |                                                                                     |
| little skate ( <i>Leucoraja erinacea</i> ) Exon 5            |                                                              | AESE010638003 (205-271)                                                                                                              |                                                                                     |
| little skate ( <i>Leucoraja erinacea</i> ) Exon 6            |                                                              | AESE011694600 (587-500)                                                                                                              |                                                                                     |
| little skate ( <i>Leucoraja erinacea</i> ) Exon 8            |                                                              | AESE012042833 (107-206)                                                                                                              |                                                                                     |
| little skate ( <i>Leucoraja erinacea</i> ) Exon 9            | AESE011485742 (1535-1464)                                    |                                                                                                                                      |                                                                                     |
| <i>NPDC1L</i><br>(Exons 5-9)                                 | Japanese gecko ( <i>Gekko japonicus</i> )                    | EB172012 (1-523)                                                                                                                     |                                                                                     |
|                                                              | Indian python ( <i>Python molurus</i> ) (Exons 5-7)          | AEQU010264385 (1694-1628, 1356-1272, 828-752)                                                                                        |                                                                                     |
|                                                              | green anole ( <i>Anolis carolinensis</i> )                   | WGS trace archives Ti:1411938372 (339-405), AAWZ02031143 (3431-3347, 1639-1563), AAWZ02037787 (11785-11692, 7770-7705)               |                                                                                     |
|                                                              | painted turtle ( <i>Chrysemys picta bellii</i> ) (Exons 6-8) | AHGY01303137 (1423-1339, 1069-993, 262-172)                                                                                          |                                                                                     |
|                                                              | coelacanth ( <i>Latimeria chalumnae</i> )                    | AFYH01090867 (3719-3785, 5136-5211, 6685-6764, 8172-8268, 9231-9308)                                                                 |                                                                                     |
|                                                              | dogfish ( <i>Squalus acanthias</i> )                         | EE298588, EE627674, ES324472, CX196534, EE298992, EE886600                                                                           |                                                                                     |
|                                                              | little skate ( <i>Leucoraja erinacea</i> ) Exon 5            | AESE012086843 (111-45)                                                                                                               |                                                                                     |
| little skate ( <i>Leucoraja erinacea</i> ) Exon 8            | AESE011734244 (193-94)                                       |                                                                                                                                      |                                                                                     |
| tunicate<br><i>NPDC1/NPDC1L</i><br>homologue                 | tunicate ( <i>Ciona savignyi</i> ) (Exons 5-9)               | AACT01015729 (12830-12896, 14325-14415, 15427-15506, 15995-16103, 16335-16481)                                                       |                                                                                     |
