# Supplementary material for: On the origin of POU5F1
Source: BMC Biol. 2013 May 9;11:56. doi: 10.1186/1741-7007-11-56 (PMC3665618; doi:10.1186/1741-7007-11-56)
Supplement: Additional file 2 — NPDC1 and NPDC1L alignments. Alignments of NPDC1 and NPDC1L sequences used for phylogenetic analyses. [file 1741-7007-11-56-S2.pdf]

Additional file 2

Exons 5-8

| Exons 5-8                |                                                                                                                                                       |                                                                                                                                                              |        |                                                                           |                                                                                     |
|--------------------------|-------------------------------------------------------------------------------------------------------------------------------------------------------|--------------------------------------------------------------------------------------------------------------------------------------------------------------|--------|---------------------------------------------------------------------------|-------------------------------------------------------------------------------------|
|                          | Exon 5                                                                                                                                                | Exon 6                                                                                                                                                       | Exon 7 | Exon 8                                                                    |                                                                                     |
| NPDC1L                   | anole NPDC1L                                                                                                                                          | L V V H C T V T G V S G L V V A A I C W Y R L Q K E V H L A Q K I A Y T -- A N R G N Q Y Y H Q P S A Y H D S R L A Q S C Q V H Y Y Q H Q K L L T S -- --     |        |                                                                           | E D R E P P K M V E Q I - S T E S E N E N G D Y T V Y E C P G L A F -- --           |
|                          | gecko NPDC1L                                                                                                                                          | L V V H C T V T G V S G L V V A A I C W Y R L Q E V H L A Q K M A Y S -- A T R G N Q Y Y H Q P S A Y H D S R L A Q S C Q V H Y Y Q H Q K L L T S -- --       |        |                                                                           | G E D K D P P K A V K Q L - S T E S E N E - - D Y T V Y E C P G L A F -- --         |
|                          | coelNPDC1L                                                                                                                                            | L V I I C T I T G F S G L V V A G L C W Y R L Q R E V H L A Q K M A Y T -- A Y R G T R R R -- -- N T R P G D V R L A Q S I Q V H Y Y Q R Q K T I L S H -- -- |        |                                                                           | E E G L P K S K K Q L S L - D S E V E N E N G E Y T V Y E C P G L A F -- --         |
|                          | dogfish ESTs                                                                                                                                          | L V I I C T V T G F F G L I V A G L C W Y R L Q K E V H L A Q K M A Y E - G I K Q P L T Q - - - - - I D G K I A K K L Q R H H Y Y Q H Q K V I Q A M - -      |        |                                                                           | E E G K S E P K M Q M S T D S E T E N E N G E Y T V Y E C P G L A F -- --           |
|                          | coelNPDC1                                                                                                                                             | V I I V C A V T G V S A L I V A G V C W Y R L Q K D S R L A Q K T D Y S - - V F R N P N I A L D N S S - G D K K L A Q S A Q M Y H Y Q H Q K Q M L S H - -    |        |                                                                           | E K H K E E P K V P D S A T T S D E E N E D G D F T V Y E C P G L A F -- --         |
| NPDC1                    | spotted gar NPDC1                                                                                                                                     | M I A V C I V V G T A A L I V A G V C W I R L Q K D V R L A Q K Y D Y P - - A F G V M G S S E D S T S - G D K K L A Q S A Q M Y H Y Q H Q K Q M L S L - -    |        |                                                                           | E K H K E E P K I P D S G T T T D E E N E D G D F T V Y E C P G L A F -- --         |
|                          | zebrafish NPDC1                                                                                                                                       | M I S L C I I V G A M A L I L V T V C W R L Q R E T R L A Q K Y D Y P - - A F G Q A A N E - N N T S S G D K L A H S A Q M Y H Y Q H Q K Q M L S H - -        |        |                                                                           | E K H K A E P K V S S G G H S D E E T E E G D F T V Y E C P G L A F -- --           |
|                          | salmon NPDC1                                                                                                                                          | M I S V C V I V G A A G L I L A T V F W R L Q K E S H L A Q K Y D Y P - - A F G S H G N G T V N R T S S G D K K L A Q S A Q M Y H Y Q H Q K Q M L S H - -    |        |                                                                           | E N H K S E P K V A D S E V T S D E E E V D G D F T V Y E C P G L A F -- --         |
|                          | turtle NPDC1                                                                                                                                          | M I V V F S V A G I I A L I V A A I C W C R L Q K E I R L A Q K T D Y - - S Q K L G P L Y D K - - F G D Q T L A Q S A Q M Y H Y Q H Q K Q M L S H - -        |        |                                                                           | E K H K E E P K L P D S A - S S D E E N E D G D F T V Y E C P G L A F -- --         |
|                          | chicken NPDC1                                                                                                                                         | L I V V C T L A G I S A L I V A A V C W C R L Q K E V R L A Q K A D Y S - - A Q R V A S L L Y D K I S F G D K T L A Q S A Q M Y H Y Q H Q K Q M L S H - -    |        |                                                                           | E K H K E E P K V P D S A - S S D E E N E D G D F T V Y E C P G L A F -- --         |
|                          | tammar NPDC1                                                                                                                                          | M I V V C A V A G L S A L V A V V C W C R L Q K E I R L A Q K T D Y S S K S Q K V S S - A F G R S H - G D K K L A Q S A Q M Y H Y Q H Q K Q M L S L - -      |        |                                                                           | E K H K E E P K M H D S G - S S E E E N E D G D F T V Y E C P G L A F M N A L -- -- |
|                          | opossum NPDC1                                                                                                                                         | M I V V C A V A G L S A L V A V V C W C R L Q K E I R L A Q K T D Y S S K S Q K V S S - A F G R S H - G D K K L A Q S A Q M Y H Y Q H Q K Q M L S L - -      |        |                                                                           | E K H K E E P K I H D S G - S S E E E N E D G D F T V Y E C P G L A F M N A L -- -- |
|                          | elephant NPDC1                                                                                                                                        | L I L A C S L A G A A A L A M A A F C W C R L Q R E I R L T Q K A D Y A - - A Q K D P G S - A S P R I S - G D Q R L A H S A E Y H Y Q H Q K Q M L C L - -    |        |                                                                           | E R H K E P P K E L D S V - S S D E E N E D G D F T V Y E C P G L A F -- --         |
|                          | mouse NPDC1                                                                                                                                           | L I L A F C L A S S A A L A V A A L C W C R L Q R E I R L T Q K A D Y A - - T A K G P T S - S T P R I S - G D Q R L A H S A E Y H Y Q H Q R Q M L C L - -    |        |                                                                           | E R H K E P P K E L E S A - S S D E E N E D G D F T V Y E C P G L A F -- --         |
|                          | human NPDC1                                                                                                                                           | L I L A F C V A G A A A L S V A S L C W C R L Q R E I R L T Q K A D Y A - - T A K A P G S - A A A P R I S - G D Q R L A Q S A E Y H Y Q H Q R Q M L C L - -  |        |                                                                           | E R H K E P P K E L D T A - S S D E E N E D G D F T V Y E C P G L A F -- --         |
| tunicate NPDC1 homologue | I I V A S C A I G I A G F A A A A I C W F R A R K L T G L A Q K T P A Y G V T G N L H L S S Y E K I D S K L N K S A E V F H Y N O T K K K I A L S S - |                                                                                                                                                              |        | S S N H D F H D D A A E L E N D E E T S D G E Y T V Y E C S G F A S -- -- |                                                                                     |

Exon 5

|                            |                                           |
|----------------------------|-------------------------------------------|
| python NPDC1L              | L V V H C T V T G V S G L V V A A I C W Y |
| anole NPDC1L               | L V V H C T V T G V S G L V V A A I C W Y |
| gecko NPDC1L               | L V V H C T V T G V S G L V V A A I C W Y |
| coelacanth NPDC1L          | L V I I C T I T G F S G L V V A G L C W Y |
| dogfish ESTs               | L V I I C T V T G F F G L I V A G L C W Y |
| little skate AESE01208643  | L V I I C T V T G L L G L A V A A R C W Y |
| little skate AESE010638003 | L I I V C T V A G V S G L I I A G I C W Y |
| elephantfish AAVX01002865  | L I I V C T V A G V S G L I V A G I C W C |
| coelacanth NPDC1           | V I I V C A V T G S A L I V A G V C W Y   |
| spotted gar NPDC1          | M I A V C I V V G T A A L I V A G V C W I |
| zebrafish NPDC1            | M I S L C I I V G A M A L I L V T V C W V |
| salmon NPDC1               | M I S V C V I V G A A G L I L A T V F W V |
| turtile NPDC1              | M I V V F S V A G I I A L I V A A I C W C |
| chicken NPDC1              | L I V V C T L A G I S A L I V A A V C W C |
| platypus NPDC1             | M I V V C T V A G A S A L I V A A C W C   |
| tamarin NPDC1              | M I V V C A V A G L S A L V V A V V C W C |
| opossum NPDC1              | M I V V C A V A G L S A L V V A V V C W C |
| elephant NPDC1             | I L A C S L A G A A A L A M A A F C W C   |
| mouse NPDC1                | L I L A F C L A S S A A L A V A A L C W C |
| human NPDC1                | L I L A F C V A G A A A L S V A S L C W C |
| tunicate NPDC1 homologue   | I I V A S C A I G I A G F A A A A I C W F |

Exon 6

|                            |                                                                                                                                                                                                                                 |
|----------------------------|---------------------------------------------------------------------------------------------------------------------------------------------------------------------------------------------------------------------------------|
| python NPDC1L              | L Q E V R L A Q K M A Y T -- A T R G N Q Y Y H Q P S A Y H D S R L A Q S C Q V H Y Y Q H Q K L L T S -- -- E D R E P P K M V E Q I - S T E S E N E N G D Y T V Y E C P G L A F -- --                                            |
| anole NPDC1L               | L Q E V H L A Q K I A Y T -- A N R G N Q Y Y H Q P S A Y H D S R L A Q S C Q V H Y Y Q H Q K L L T S -- -- G E D K D P P K A V K Q L - S T E S E N E - - D Y T V Y E C P G L A F -- --                                          |
| gecko NPDC1L               | L Q E V R L A Q K M A Y S -- A T R G N Q Y Y H Q P S A Y H D S R L A Q S C Q V H Y Y Q R Q K T I L S H -- -- E E G L P K S K K Q L S L - D S E V E N E N G E Y T V Y E C P G L A F -- --                                        |
| turtile NPDC1L             | L Q E V R L A Q K M A Y T -- A T R G N Q Y Y H Q P S A Y H D S R L A Q S C Q V H Y Y Q R Q K T I L S H -- -- E E G L P K S K K Q L S L - D S E V E N E N G E Y T V Y E C P G L A F -- --                                        |
| coelacanth NPDC1L          | L Q E V H L A Q K M A Y T -- A T R G N Q Y Y H Q P S A Y H D S R L A Q S C Q V H Y Y Q R Q K T I L S H -- -- E E G L P K S K K Q L S L - D S E V E N E N G E Y T V Y E C P G L A F -- --                                        |
| dogfish ESTs               | L Q E V R L A Q K M A Y E - - - - - G I K Q P L T Q - - - - - I D G K I A K K L Q R H H Y Y Q H Q K V I Q A M - - E E G K S E P K M Q M S T D S E T E N E N G E Y T V Y E C P G L A F -- --                                     |
| little skate AESE011694600 | L Q E V R L A Q K M A Y E - - - - - G I K Q P L T Q - - - - - I D G K I A K K L Q R H H Y Y Q H Q K V I Q A M - - E E G K S E P K M Q M S T D S E T E N E N G E Y T V Y E C P G L A F -- --                                     |
| elephantfish AAVX01002865  | M Q R E L K L T Q K A D Y Q - - V Y G V G I N A T E M S L - - - - - A Q K D P G S - A S P R I S - G D Q R L A H S A E Y H Y Q H Q K Q M L C L - - E R H K E P P K E L D S V - S S D E E N E D G D F T V Y E C P G L A F -- --   |
| coelacanth NPDC1           | L Q K D S R L A Q K T D Y S - - V F R N P N I A L D N S S - G D K K L A Q S A Q M Y H Y Q H Q K Q M L S H - - E K H K E E P K V P D S A T T S D E E N E D G D F T V Y E C P G L A F -- --                                       |
| spotted gar NPDC1          | L Q K D V R L A Q K Y D Y P - - A F G V M G S S E D S T S - G D K K L A Q S A Q M Y H Y Q H Q K Q M L S L - - E K H K E E P K I P D S G T T T D E E N E D G D F T V Y E C P G L A F -- --                                       |
| zebrafish NPDC1            | L Q R E T R L A Q K Y D Y P - - A F G Q A A N E - N N T S S G D K L A H S A Q M Y H Y Q H Q K Q M L S H - - E K H K A E P K V S S G G H S D E E T E E G D F T V Y E C P G L A F -- --                                           |
| salmon NPDC1               | L Q K E S H L A Q K Y D Y P - - A F G S H G N G T V N R T S S G D K K L A Q S A Q M Y H Y Q H Q K Q M L S H - - E N H K S E P K V A D S E V T S D E E E V D G D F T V Y E C P G L A F -- --                                     |
| turtile NPDC1              | L Q K E I R L A Q K T D Y - - S Q K L G P L Y D K - - F G D Q T L A Q S A Q M Y H Y Q H Q K Q M L S H - - E K H K E E P K L P D S A - S S D E E N E D G D F T V Y E C P G L A F -- --                                           |
| chicken NPDC1              | L Q K E V R L A Q K A D Y S - - A Q R V A S L L Y D K I S F G D K T L A Q S A Q M Y H Y Q H Q K Q M L S H - - E K H K E E P K V P D S A - S S D E E N E D G D F T V Y E C P G L A F -- --                                       |
| platypus NPDC1             | L Q K E I R L A Q K T D Y L - - A Q K V S S S - E R D K T S - - - - - A Q K D P G S - A S P R I S - G D Q R L A H S A E Y H Y Q H Q K Q M L C L - - E R H K E P P K E L E S A - S S D E E N E D G D F T V Y E C P G L A F -- -- |
| tamarin NPDC1              | L Q K E I R L A Q K T D Y S S K S Q K V S S - A F G R S H - G D K K L A Q S A Q M Y H Y Q H Q K Q M L S L - - E K H K E E P K M H D S G - S S E E E N E D G D F T V Y E C P G L A F M N A L -- --                               |
| opossum NPDC1              | L Q K E I R L A Q K T D Y S S K S Q K V S S - A F G R S H - G D K K L A Q S A Q M Y H Y Q H Q K Q M L S L - - E K H K E E P K M H D S G - S S E E E N E D G D F T V Y E C P G L A F M N A L -- --                               |
| elephant NPDC1             | L Q R E I R L S Q K A D Y A - - A Q K D P G S - A S P R I S - G D Q R L A H S A E Y H Y Q H Q K Q M L C L - - E R H K E P P K E L D S V - S S D E E N E D G D F T V Y E C P G L A F -- --                                       |
| mouse NPDC1                | L Q R E I R L T Q K A D Y A - - T A K G P T S - S T P R I S - G D Q R L A H S A E Y H Y Q H Q R Q M L C L - - E R H K E P P K E L E S A - S S D E E N E D G D F T V Y E C P G L A F -- --                                       |
| human NPDC1                | L Q R E I R L T Q K A D Y A - - T A K A P G S - A A A P R I S - G D Q R L A Q S A E Y H Y Q H Q R Q M L C L - - E R H K E P P K E L D T A - S S D E E N E D G D F T V Y E C P G L A F -- --                                     |
| tunicate NPDC1 homologue   | A R K L T G L A Q K T D Y P - - A Y G V T G N L H L S S Y E K I D S K L N K S A E V F H Y N O T K K K I A L S S - S S N H D F H D D A A E L E N D E E T S D G E Y T V Y E C S G F A S -- --                                     |

Exon 8

|                            |                                                                                     |
|----------------------------|-------------------------------------------------------------------------------------|
| anole NPDC1L               | --- E D R E P P K M V E Q I - S T E S E N E N G D Y T V Y E C P G L A F ---         |
| gecko NPDC1L               | --- G E D K D P P K A V K Q L - S T E S E N E - - D Y T V Y E C P G L A F ---       |
| turtile NPDC1L             | --- E E G L P K S K K Q L S L - D S E V E N E N G E Y T V Y E C P G L A F ---       |
| coelacanth NPDC1L          | --- E E G L P K S K K Q L S L - D S E V E N E N G E Y T V Y E C P G L A F ---       |
| dogfish ESTs               | --- E E G K S E P K M Q M S T D S E T E N E N G E Y T V Y E C P G L A F ---         |
| little skate AESE011734244 | --- E E G K S E P K M Q M S T D S E T E N E N G E Y T V Y E C P G L A F ---         |
| little skate AESE012042833 | --- E E G K S E P K M Q M S T D S E T E N E N G E Y T V Y E C P G L A F ---         |
| elephantfish AAVX01174269  | --- E E G K S E P K M Q M S T D S E T E N E N G E Y T V Y E C P G L A F ---         |
| coelacanth NPDC1           | --- E E G K S E P K M Q M S T D S E T E N E N G E Y T V Y E C P G L A F ---         |
| spotted gar NPDC1          | --- E E G K S E P K M Q M S T D S E T E N E N G E Y T V Y E C P G L A F ---         |
| zebrafish NPDC1            | --- E E G K S E P K M Q M S T D S E T E N E N G E Y T V Y E C P G L A F ---         |
| medaka NPDC1               | --- E E G K S E P K M Q M S T D S E T E N E N G E Y T V Y E C P G L A F ---         |
| salmon NPDC1               | --- E E G K S E P K M Q M S T D S E T E N E N G E Y T V Y E C P G L A F ---         |
| turtile NPDC1              | --- E E G K S E P K M Q M S T D S E T E N E N G E Y T V Y E C P G L A F ---         |
| chicken NPDC1              | --- E E G K S E P K M Q M S T D S E T E N E N G E Y T V Y E C P G L A F ---         |
| tamarin NPDC1              | --- E E G K S E P K M Q M S T D S E T E N E N G E Y T V Y E C P G L A F M N A L --- |
| opossum NPDC1              | --- E E G K S E P K M Q M S T D S E T E N E N G E Y T V Y E C P G L A F M N A L --- |
| elephant NPDC1             | --- E E G K S E P K M Q M S T D S E T E N E N G E Y T V Y E C P G L A F ---         |
| mouse NPDC1                | --- E E G K S E P K M Q M S T D S E T E N E N G E Y T V Y E C P G L A F ---         |
| human NPDC1                | --- E E G K S E P K M Q M S T D S E T E N E N G E Y T V Y E C P G L A F ---         |
| tunicate NPDC1 homologue   | --- E E G K S E P K M Q M S T D S E T E N E N G E Y T V Y E C S G F A S ---         |
